# Supplementary material for: COVID-19 Vaccine Acceptance among College Students: A Theory-Based Analysis
Source: MDPI journal article supplement (doi:10.3390/ijerph18094617), 2021-04-27
Supplement: s1 [file s1]

Directions: This survey is voluntary, which means you may choose not to complete it or not to answer individual questions. There is no direct benefit of this survey to you but your responses will help in developing effective COVID-19 vaccine promotion programs. All personal data from this survey will be kept confidential. If you agree, please choose the response that correctly describes your position. Thank you for your help!

1. If the COVID-19 vaccine was offered to you today, do you have any hesitancy in taking it? ☐ Yes ☐ No
2. How old are you today? \_\_\_\_\_ years
3. What is your gender? ☐ Male ☐ Female ☐ Other \_\_\_\_\_
4. What is your ethnicity? ☐ Hispanic or Latino/Latina ☐ Non-Hispanic or Latino/Latina
5. What is your race? ☐ American Indian or Alaska Native ☐ Asian ☐ Black or African American ☐ Native Hawaiian or Other Pacific Islander ☐ White ☐ Other \_\_\_\_\_
6. What is your class? ☐ Freshmen ☐ Sophomore ☐ Junior ☐ Senior ☐ Graduate
7. Have you been encouraged by a health care provider to take COVID-19 vaccine? ☐ Yes ☐ No
8. What is your political affiliation? ☐ Republican ☐ Democratic ☐ Independent ☐ Other
9. What is your religion? ☐ Christianity ☐ Islam ☐ Buddhism

- ☐ Judaism
- ☐ Atheist
- ☐ Hinduism
- ☐ Other

10. Where do you live? ☐ On-campus  
☐ Off-campus

11. What is your current overall GPA? ☐ Less than 1.99  
 (on a 4.00 scale) ☐ 2.00 – 2.49  
☐ 2.50 – 2.99  
☐ 3.00 – 3.49  
☐ 3.50 – 4.00

12. Do you have health insurance? ☐ Yes  
☐ No

13. Do you work for pay? ☐ No  
☐ Yes, How many hours? \_\_\_\_\_

14. What is your marital status? ☐ Married  
☐ Divorced  
☐ Widowed  
☐ Separated  
☐ Never married  
☐ In a civil union or registered domestic partnership  
☐ A member of an unmarried couple

Never Almost  
Never Sometimes Fairly  
Often Very  
Often

15. Taking the COVID-19 vaccine will protect  
me against coronavirus infection. ☐ ☐ ☐ ☐ ☐

16. Taking the COVID-19 vaccine will protect  
my family from getting coronavirus infection. ☐ ☐ ☐ ☐ ☐

17. Taking the COVID-19 vaccine will allow me to  
resume my daily activities. ☐ ☐ ☐ ☐ ☐

|                                                                                                                                                                                       | Never                    | Almost<br>Never          | Sometimes                | Fairly<br>Often          | Very<br>Often            |
|---------------------------------------------------------------------------------------------------------------------------------------------------------------------------------------|--------------------------|--------------------------|--------------------------|--------------------------|--------------------------|
| 18. Taking the COVID-19 vaccine may not be safe. <input type="checkbox"/>                                                                                                             | <input type="checkbox"/> | <input type="checkbox"/> | <input type="checkbox"/> | <input type="checkbox"/> | <input type="checkbox"/> |
| .....                                                                                                                                                                                 |                          |                          |                          |                          |                          |
| 19. It bothers me that long-term studies have not been<br>done on COVID-19 vaccine. <input type="checkbox"/>                                                                          | <input type="checkbox"/> | <input type="checkbox"/> | <input type="checkbox"/> | <input type="checkbox"/> | <input type="checkbox"/> |
| .....                                                                                                                                                                                 |                          |                          |                          |                          |                          |
| 20. It concerns me that COVID-19 vaccine may<br>become ineffective due to mutation of the virus. <input type="checkbox"/>                                                             | <input type="checkbox"/> | <input type="checkbox"/> | <input type="checkbox"/> | <input type="checkbox"/> | <input type="checkbox"/> |
| .....                                                                                                                                                                                 |                          |                          |                          |                          |                          |
|                                                                                                                                                                                       | Not At<br>All Sure       | Slightly<br>Sure         | Moderately<br>Sure       | Very<br>Sure             | Completely<br>Sure       |
| 21. How sure are you that you can take COVID-19<br>vaccine, if it is available today? <input type="checkbox"/>                                                                        | <input type="checkbox"/> | <input type="checkbox"/> | <input type="checkbox"/> | <input type="checkbox"/> | <input type="checkbox"/> |
| .....                                                                                                                                                                                 |                          |                          |                          |                          |                          |
| 22. How sure are you that you can complete the<br>2-shot course of COVID-19 vaccine despite<br>getting side effects, if it is available today? <input type="checkbox"/>               | <input type="checkbox"/> | <input type="checkbox"/> | <input type="checkbox"/> | <input type="checkbox"/> | <input type="checkbox"/> |
| .....                                                                                                                                                                                 |                          |                          |                          |                          |                          |
| 23. How sure are you that you can complete the<br>2-shot course of COVID-19 vaccine despite<br>worries about long term studies, if it is<br>available today? <input type="checkbox"/> |                          |                          |                          | <input type="checkbox"/> | <input type="checkbox"/> |
| .....                                                                                                                                                                                 |                          |                          |                          |                          |                          |
|                                                                                                                                                                                       | Not At<br>All Sure       | Slightly<br>Sure         | Moderately<br>Sure       | Very<br>Sure             | Completely<br>Sure       |
| 24. How sure are you that you will have access<br>to the COVID-19 vaccine when it is available<br>to you? <input type="checkbox"/>                                                    | <input type="checkbox"/> | <input type="checkbox"/> | <input type="checkbox"/> | <input type="checkbox"/> | <input type="checkbox"/> |
| .....                                                                                                                                                                                 |                          |                          |                          |                          |                          |
| 25. How sure are you that you will be able to<br>afford the COVID-19 vaccine when it is<br>available to you? <input type="checkbox"/>                                                 | <input type="checkbox"/> | <input type="checkbox"/> | <input type="checkbox"/> | <input type="checkbox"/> | <input type="checkbox"/> |
| .....                                                                                                                                                                                 |                          |                          |                          |                          |                          |
| 26. How sure are you that you will be able to<br>go and get the COVID-19 vaccine when it is<br>available to you? <input type="checkbox"/>                                             | <input type="checkbox"/> | <input type="checkbox"/> | <input type="checkbox"/> | <input type="checkbox"/> | <input type="checkbox"/> |
| .....                                                                                                                                                                                 |                          |                          |                          |                          |                          |
|                                                                                                                                                                                       | Not At<br>All Likely     | Somewhat<br>Likely       | Moderately<br>Likely     | Very<br>Likely           | Completely<br>Likely     |
| 27. How likely is it that you will take COVID-19<br>vaccine when it is available to you? <input type="checkbox"/>                                                                     | <input type="checkbox"/> | <input type="checkbox"/> | <input type="checkbox"/> | <input type="checkbox"/> | <input type="checkbox"/> |
| .....                                                                                                                                                                                 |                          |                          |                          |                          |                          |

*Thank you for your time!*

## SCORING GUIDE

**Construct of advantages:** Rate items 15-17 on a scale of 0-4 and then sum to derive a possible score of 0-12 units.

**Construct of disadvantages:** Rate items 18-20 on a scale of 0-4 and then sum to derive a possible score of 0-12 units.

**Construct of participatory dialogue:** Subtract disadvantages from advantages score to derive a possible score of -12 to + 12 units .

**Construct of behavioral confidence:** Rate items 21-23 on a scale of 0-4 and then sum to derive a possible score of 0-12 units.

**Construct of changes in the physical environment:** Rate items 24-26 on a scale of 0-4 and then sum to derive a possible score of 0-12 units.

**Construct of initiation intention:** Rate item 27 on a scale of 0-4 and derive a possible score of 0-4 units.

**Flesch Reading Ease: 63.5**

**Flesch-Kincaid Grade Level: 5.9**

© Manoj Sharma
